# Supplementary material
Source: Research Square preprint supplement (doi:10.21203/rs.3.rs-9376873/v1)
Supplement: Supplementary file 1 [file a56489a3a459f3bed43951be.xlsx]

## Sheet: Sheet1
Supplementary Table 1: Primers Used in This Research
Primer	Sequence
ADH1-qp-F	tattcgatgcaaagctgctgtg
ADH1-qp-R	cgaacttcgtgtttctgcggt
HB1-qp-F	tttgaggtggccaagtatgca
HB1-qp-R	tgatcataagcctgaccccaa
PDC1-qp-F	cgattatggcactaaccggatt
PDC1-qp-R	tgttcaccaccgcctgataac
JAZ1-qp-F	agcttcacttcaccggttcttgga
JAZ1-qp-R	tcttgtcttgaagcaacgtcgtca
JAZ5-qp-F	ttcgatccaccagggaaaca
JAZ5-qp-R	atgaggtagagggttcgcct
AOS-qp-F	acggtttaccaatcgtaggacc
AOS-qp-R	ttgactctgtacaccgtggagtt
RAP2.12-qp-F	gctcaagtctatggatttcgaga
RAP2.12-qp-R	gcaccattgtcctgagtcgtta
MYC2-qp-F	atgactgattaccggctacaac
MYC2-qp-R	accgatttttgaaatcaaacttgctc
ACTIN8-qp-F	tctccagcatatcctgccttg
ACTIN8-qp-R	aatgtcggaagtagagggcg
pUC119-RAP2.12-F	gtttttctgattaacagggatccatgtgtggaggagctataatatccg
pUC119-RAP2.12-R	cgtccttgtagtcagaaggcctgaagactcctccaatcatggaatg
pUC119-MYC2-F	gtttttctgattaacagggatccatgactgattaccggctacaac
pUC119-MYC2-R	ttaagcgtaatctggtacgtcgtatgggtaaccgatttttgaaatcaaacttgc
pUC119-MYC2253-623-F	gtttttctgattaacagggatccatgaatttcgacggcggagc
pUC119-MYC21-252-R	ttaagcgtaatctggtacgtcgtatgggtagaaaagaattcgaaccttgttaat
pUC119-HA-adaptor-R	cgtccttgtagtcagaaggcctttaagcgtaatctggtacgtcgtatgggta
p1300-RAP2.12-F	cacgggggactctagaggatccatgtgtggaggagctataatatccg
P1300-RAP2.12-R	gaacgatcggggaaattcgagctcttagccaaatgtttgaacgatctg
RAP2.12-AD-F	gccatggaggccagtgaattcatgtgtggaggagctataatatccg
RAP2.12-AD-R	gatgcccacccgggtggaattcgaagactcctccaatcatggaatg
MYC2-BD-F	ggccatggaggccagtgaattcatgactgattaccggctacaac
MYC21-252-BD-R	gatgcccacccgggtggaattcttagaaaagaattcgaaccttgttaataag
MYC2253-623-BD-F	ggccatggaggccagtgaattcatgaatttcgacggcggagc
pGreen800-pADH1-F	cactatagggcgaattgggtacccttttcatggctggtgcttc
pGreen800-pADH1-R	gccgctctagaactagtggatcctatcaacagtgaagaacttgcttttgatc
pGreen800-RAP2.12-F	cctgcagcccgggggatccatgtgtggaggagctataatatccg
pGreen800-RAP2.12-R	cgctctagaactagtggatccttgaagactcctccaatcatggaatg
